# Supplementary material for: A Biomonitoring Pilot Study in Workers from a Paints Production Plant Exposed to Pigment-Grade Titanium Dioxide (TiO2)
Source: MDPI journal article supplement (doi:10.3390/toxics10040171), 2022-03-31
Supplement: s1 [file s1]

# Supplementary Materials: A Biomonitoring Pilot Study in Workers from a Paints Production Plant Exposed to Pigment-Grade Titanium Dioxide (TiO<sub>2</sub>)

Enrico Bergamaschi, Valeria Bellisario, Manuela Macrì, Martina Buglisi, Giacomo Garzaro, Giulia Squillacioti, Federica Ghelli, Roberto Bono, Ivana Fenoglio, Francesco Barbero, Chiara Riganti, Antonella Marrocco, Sara Bonetta and Elisabetta Carraro

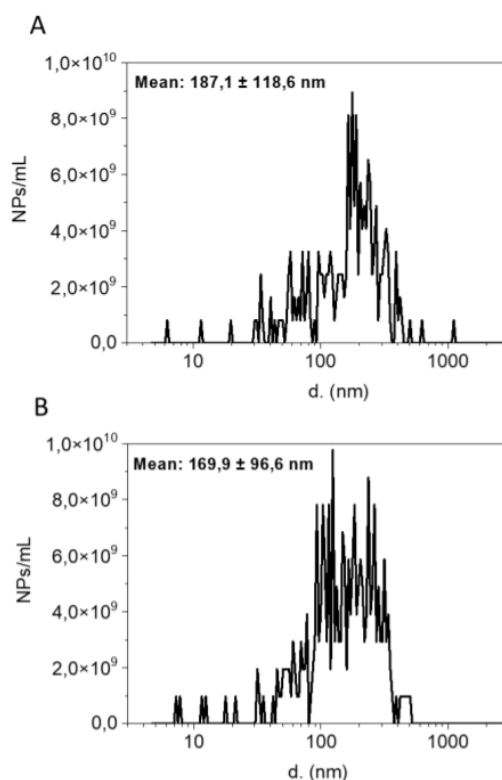

**Figure S1.** Particles size distribution evaluated by Nanoparticle Tracking Analysis (NTA). (A) Aqueous dispersion of T-PS. (B) Aqueous dispersion of T-PR.

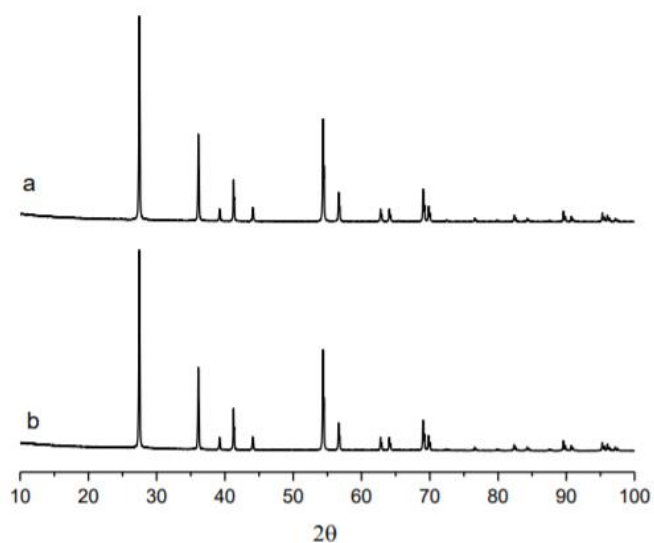

**Figure S2.** Crystalline phase. XRD patterns of (a) T-PS and (b) T-PR.

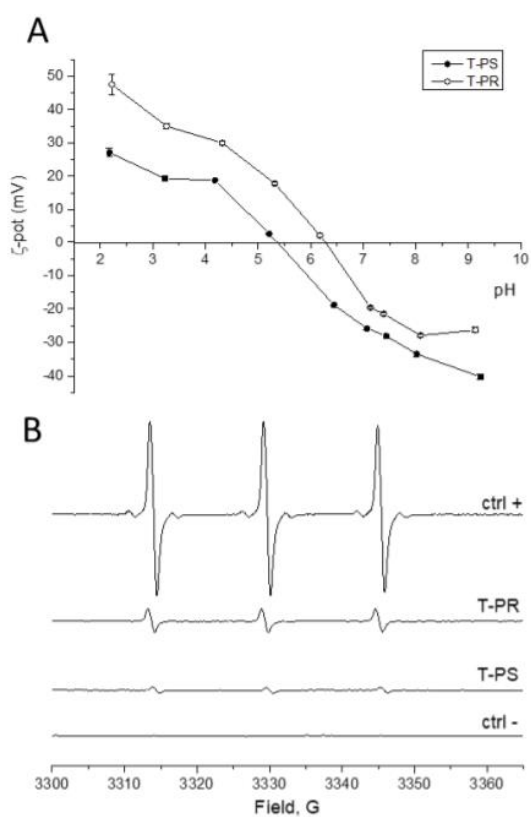

**Figure S3.**  $\zeta$ -potential and surface reactivity. (A)  $\zeta$ -potential values measured at different pH of TPS and T-PR; (B) Surface reactivity of T-PS and T-PR evaluated by EPR/spin trapping technique. Ctrl - . no powder; ctrl+ Aeroxide P25.
